# Supplementary material for: cGAS-dependent proinflammatory and immune homeostatic effects of the microtubule-targeting agent paclitaxel
Source: Frontiers journal article supplement (doi:10.3389/fimmu.2023.1127623), 2023-03-07
Supplement: Data_Sheet_1.pdf [file Data_Sheet_1.pdf]

**cGAS-dependent proinflammatory and immune homeostatic effects of the Microtubule-Targeting Agent Paclitaxel**

Angela Flavia Serpico, Caterina Pisauro, Domenico Grieco \*

\* **Correspondence:** Domenico Grieco; domenico.grieco@unina.it

Supplementary Figures

A

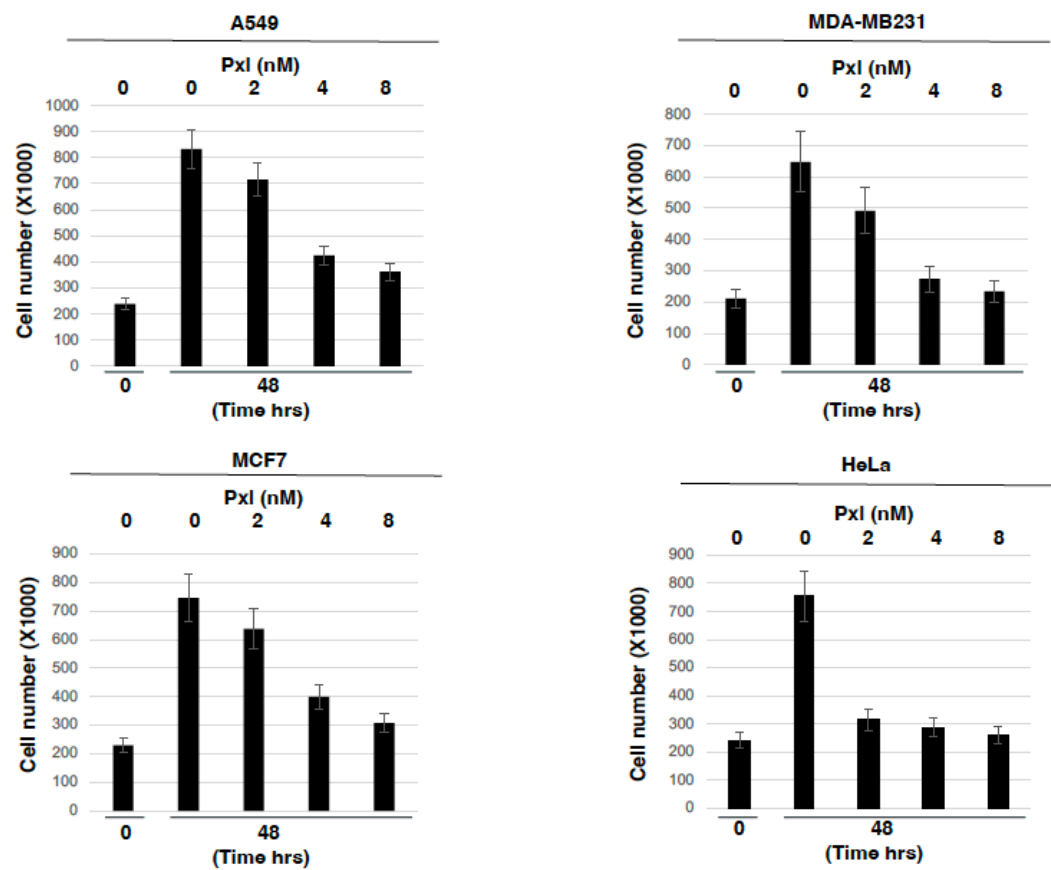

**B**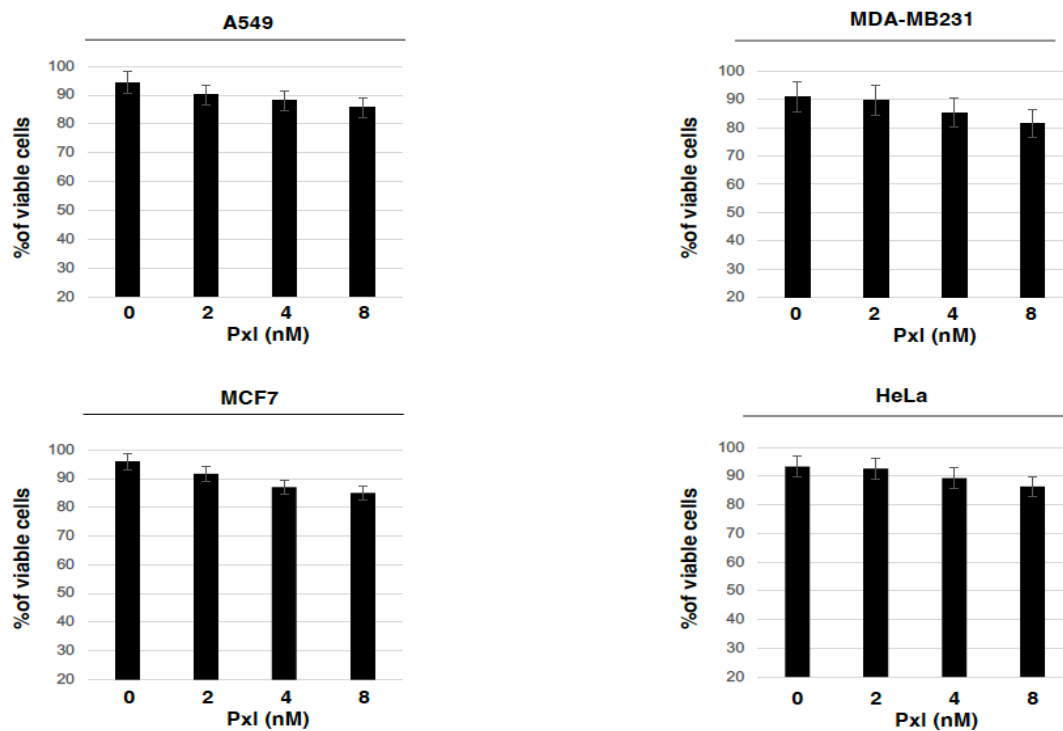

**Supplementary Figure S1.** Cytostatic effects of Pxl. (A) Cells were seeded at a cell density of 7000/cm<sup>2</sup>. The next day, one cell sample was counted (Time 0) and the other cell samples were treated with either vehicle (DMSO) as control (0 nM Pxl) or with 2, 4 and 8 nM Pxl. Cells were then counted after further 48 hours of incubation. (B) The graph reports the percent of viable cells, scored by trypan blue exclusion, after 48 hours incubation with vehicle (DMSO; 0 nM Pxl) or 2, 4 and 8 nM Pxl. Error bars refer to variability within triplicate samples.

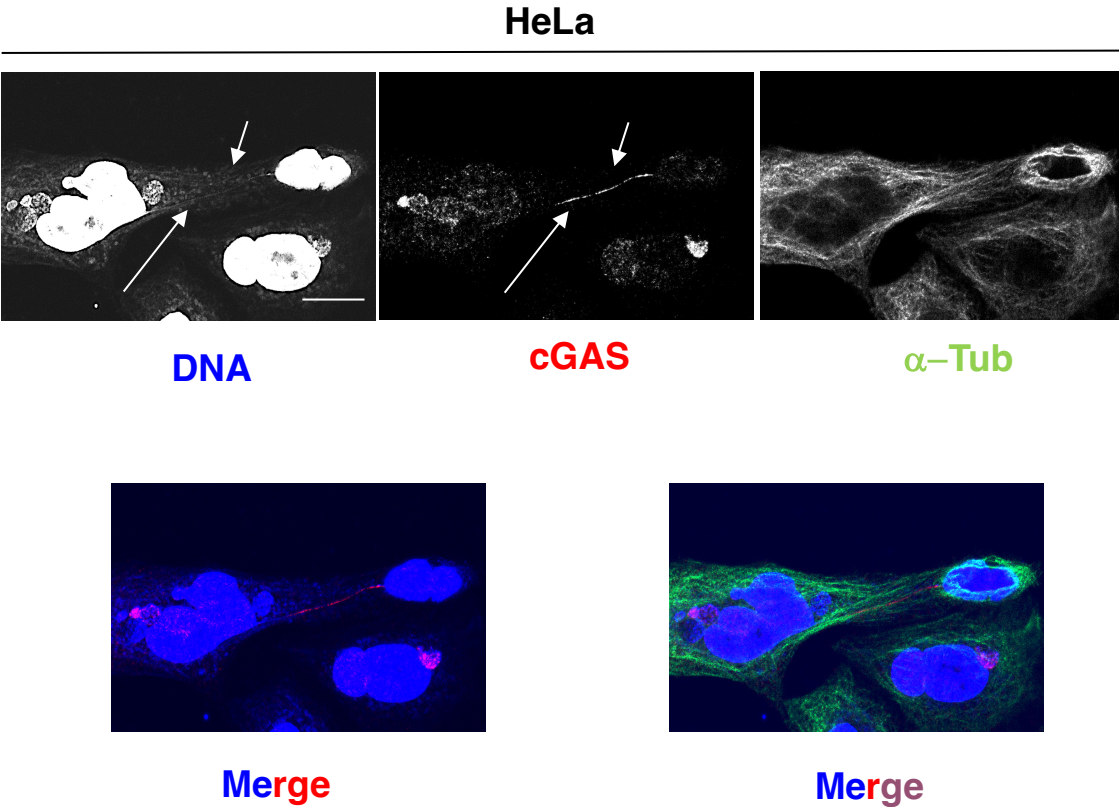

**Supplementary Figure S2.** Pxl induces formation of cGAS-positive chromatin bridges. HeLa cells were treated for 48 hours with Pxl (4 nM) fixed and processed for indirect immunofluorescence (IF) staining for the indicated antigens (cGAS in red;  $\alpha$ -tubulin ( $\alpha$ -Tub) in green; DNA in blue. Arrowheads indicate cGAS-positive chromatin bridges.
